# Supplementary material for: Evaluation of the Information Quality of Bone Mineral Density–Related Videos on TikTok
Source: Research Square preprint supplement (doi:10.21203/rs.3.rs-8217421/v1), 2026-01-27
Supplement: Supplementary file 1 [file 63adc6c883f705ffff21e495.docx]

**Supplementary Materials**

**Supplementary Table1** Global quality score (GQS) quality criteria.

| **Item features** | **Points** |
| --- | --- |
| Poor quality; poor flow of the videos; most information missing; not at all useful for patients | 1 |
| Generally, poor quality; some information listed, but many important topics missing; of very limited use to patients | 2 |
| Moderate quality; suboptimal flow; some important adequately discussed, but other information poorly discussed; somewhat useful for patients | 3 |
| Good quality and generally good flow; most of the relevant information listed, but some topics not covered; useful for patients | 4 |
| Excellent quality and flow; very useful for patients | 5 |

**Supplementary Table 2** Journal of the American Medical Association (JAMA) benchmark criteria.

| **Score** | **Score Component** | **Description** |
| --- | --- | --- |
| **1 point** | **Authorship** | Author and contributor credentials and their affiliations should be provided. |
| **1 point** | **Attribution** | Clearly, lists all copyright information and states references and sources for content. |
| **1 point** | **Currency** | Initial date of posted content and subsequent updates to content should be provided. |
| **1 point** | **Disclosure** | Conflicts of interest, funding, sponsorship, advertising, support, and video ownership should be fully disclosed. |
